# Supplementary material for: The Basic Properties of Gold Nanoparticles and their Applications in Tumor Diagnosis and Treatment
Source: PubMed Central journal article supplement (PMC7178173; doi:10.3390/ijms21072480), 2020-04-03
Supplement: ijms-21-02480-s001.pdf [file ijms-21-02480-s001.pdf]

| Topic                            | Reference                                                                                                                                                                                                                   |
|----------------------------------|-----------------------------------------------------------------------------------------------------------------------------------------------------------------------------------------------------------------------------|
| <b>Anisotropic nanoparticles</b> | [1] Hao, E., G.C. Schatz, and J.T. Hupp, Synthesis and optical properties of anisotropic metal nanoparticles. <i>J Fluoresc</i> , 2004. 14(4): p. 331-41.                                                                   |
|                                  | [2] Li, N., P. Zhao, and D. Astruc, Anisotropic gold nanoparticles: synthesis, properties, applications, and toxicity. <i>Angew Chem Int Ed Engl</i> , 2014. 53(7): p. 1756-89.                                             |
|                                  | [3] Jones, S., et al., Recent progress on the development of anisotropic gold nanoparticles: Design strategies and growth mechanism. <i>J Environ Sci Health C Environ Carcinog Ecotoxicol Rev</i> , 2017. 35(1): p. 47-66. |
|                                  | [4] Reguera, J., et al., Anisotropic metal nanoparticles for surface enhanced Raman scattering. <i>Chem Soc Rev</i> , 2017. 46(13): p. 3866-3885.                                                                           |
|                                  | [5] Kohout, C., C. Santi, and L. Polito, Anisotropic Gold Nanoparticles in Biomedical Applications. <i>Int J Mol Sci</i> , 2018. 19(11).                                                                                    |
| <b>Atomic number</b>             | [6] Coulter, J.A., et al., Radiosensitising nanoparticles as novel cancer therapeutics--pipe dream or realistic prospect? <i>Clin Oncol (R Coll Radiol)</i> , 2013. 25(10): p. 593-603.                                     |
|                                  | [7] Popescu, R.C., M.O. Fufa, and A.M. Grumezescu, Metal-based nanosystems for diagnosis. <i>Rom J Morphol Embryol</i> , 2015. 56(2 Suppl): p. 635-49.                                                                      |
|                                  | [8] Torrisi, L., Gold nanoparticles enhancing protontherapy efficiency. <i>Recent Pat Nanotechnol</i> , 2015. 9(1): p. 51-60.                                                                                               |
|                                  | [9] Titus, D., E.J. Samuel, and S. Mohana Roopan, Current scenario of biomedical aspect of metal-based nanoparticles on gel dosimetry. <i>Appl Microbiol Biotechnol</i> , 2016. 100(11): p. 4803-16.                        |
|                                  | [10] Azharuddin, M., et al., A repertoire of biomedical applications of noble metal nanoparticles. <i>Chem Commun (Camb)</i> , 2019. 55(49): p. 6964-6996.                                                                  |
| <b>Biocompatibility</b>          | [11] Nie, L., et al., Applications of gold nanoparticles in optical biosensors. <i>J Biomed Nanotechnol</i> , 2014. 10(10): p. 2700-21.                                                                                     |
|                                  | [12] Daraee, H., et al., Application of gold nanoparticles in biomedical and drug delivery. <i>Artif Cells Nanomed Biotechnol</i> ,                                                                                         |

|                        |                                                                                                                                                                                                     |
|------------------------|-----------------------------------------------------------------------------------------------------------------------------------------------------------------------------------------------------|
|                        | 2016. 44(1): p. 410-22.                                                                                                                                                                             |
|                        | [13] Kafshdooz, L., et al., The application of gold nanoparticles as a promising therapeutic approach in breast and ovarian cancer. <i>Artif Cells Nanomed Biotechnol</i> , 2016. 44(5): p. 1222-7. |
|                        | [14] Elahi, N., M. Kamali, and M.H. Baghersad, Recent biomedical applications of gold nanoparticles: A review. <i>Talanta</i> , 2018. 184: p. 537-556.                                              |
|                        | [15] Liu, Y., B.M. Crawford, and T. Vo-Dinh, Gold nanoparticles-mediated photothermal therapy and immunotherapy. <i>Immunotherapy</i> , 2018. 10(13): p. 1175-1188.                                 |
|                        | [16] Singh, P., et al., Gold Nanoparticles in Diagnostics and Therapeutics for Human Cancer. <i>Int J Mol Sci</i> , 2018. 19(7).                                                                    |
|                        | [17] Aminabad, N.S., M. Farshbaf, and A. Akbarzadeh, Recent Advances of Gold Nanoparticles in Biomedical Applications: State of the Art. <i>Cell Biochem Biophys</i> , 2019. 77(2): p. 123-137.     |
|                        | [18] Taghizadeh, S., et al., Gold nanoparticles application in liver cancer. <i>Photodiagnosis Photodyn Ther</i> , 2019. 25: p. 389-400.                                                            |
|                        | [19] Fuller, M.A. and I. Koper, Biomedical applications of polyelectrolyte coated spherical gold nanoparticles. <i>Nano Converg</i> , 2019. 6(1): p. 11.                                            |
| <b>Biodistribution</b> | [20] Guo, J., et al., Gold nanoparticles enlighten the future of cancer theranostics. <i>Int J Nanomedicine</i> , 2017. 12: p. 6131-6152.                                                           |
|                        | [21] Hwang, S., et al., Gold nanoparticle-mediated photothermal therapy: current status and future perspective. <i>Nanomedicine (Lond)</i> , 2014. 9(13): p. 2003-22.                               |
|                        | [22] Almeida, J.P., E.R. Figueroa, and R.A. Drezek, Gold nanoparticle mediated cancer immunotherapy. <i>Nanomedicine</i> , 2014. 10(3): p. 503-14.                                                  |
| <b>Catalytic</b>       | [23] Song, S., et al., Functional nanoprobe for ultrasensitive detection of biomolecules. <i>Chem Soc Rev</i> , 2010. 39(11): p. 4234-43.                                                           |
|                        | [24] Jans, H. and Q. Huo, Gold nanoparticle-enabled biological and chemical detection and analysis. <i>Chem Soc Rev</i> , 2012. 41(7): p. 2849-66.                                                  |

|                            |                                                                                                                                                                                                                  |
|----------------------------|------------------------------------------------------------------------------------------------------------------------------------------------------------------------------------------------------------------|
|                            | [25] Wang, J. and X. Qu, Recent progress in nanosensors for sensitive detection of biomolecules. <i>Nanoscale</i> , 2013. 5(9): p. 3589-600.                                                                     |
|                            | [11] Nie, L., et al., Applications of gold nanoparticles in optical biosensors. <i>J Biomed Nanotechnol</i> , 2014. 10(10): p. 2700-21.                                                                          |
|                            | [26] Lo, V.K., A.O. Chan, and C.M. Che, Gold and silver catalysis: from organic transformation to bioconjugation. <i>Org Biomol Chem</i> , 2015. 13(24): p. 6667-80.                                             |
|                            | [27] Jiang, P., et al., Applications of Gold Nanoparticles in Non-Optical Biosensors. <i>Nanomaterials (Basel)</i> , 2018. 8(12).                                                                                |
|                            | [28] Chang, C.C., et al., Gold Nanoparticle-Based Colorimetric Strategies for Chemical and Biological Sensing Applications. <i>Nanomaterials (Basel)</i> , 2019. 9(6).                                           |
| <b>Colloidal stability</b> | [29] Falahati, M., et al., Gold nanomaterials as key suppliers in biological and chemical sensing, catalysis, and medicine. <i>Biochim Biophys Acta Gen Subj</i> , 2020. 1864(1): p. 129435.                     |
| <b>Drug delivery</b>       | [30] Kharisov, B.I., O.V. Kharissova, and S.S. Berdonosov, Radioactive nanoparticles and their main applications: recent advances. <i>Recent Pat Nanotechnol</i> , 2014. 8(2): p. 79-96.                         |
|                            | [12] Daraee, H., et al., Application of gold nanoparticles in biomedical and drug delivery. <i>Artif Cells Nanomed Biotechnol</i> , 2016. 44(1): p. 410-22.                                                      |
|                            | [14] Elahi, N., M. Kamali, and M.H. Baghersad, Recent biomedical applications of gold nanoparticles: A review. <i>Talanta</i> , 2018. 184: p. 537-556.                                                           |
|                            | [16] Singh, P., et al., Gold Nanoparticles in Diagnostics and Therapeutics for Human Cancer. <i>Int J Mol Sci</i> , 2018. 19(7).                                                                                 |
|                            | [31] Xu, J., et al., Research progress of novel inorganic nanometre materials carriers in nanomedicine for cancer diagnosis and treatment. <i>Artif Cells Nanomed Biotechnol</i> , 2018. 46(sup3): p. S492-S502. |
|                            | [17] Aminabad, N.S., M. Farshbaf, and A. Akbarzadeh, Recent Advances of Gold Nanoparticles in Biomedical Applications: State of the Art. <i>Cell Biochem Biophys</i> , 2019. 77(2): p. 123-137.                  |
|                            | [32] Das, P., et al., Multifunctional Magnetic Gold Nanomaterials                                                                                                                                                |

|                                            |                                                                                                                                                                 |
|--------------------------------------------|-----------------------------------------------------------------------------------------------------------------------------------------------------------------|
|                                            | for Cancer. Trends Biotechnol, 2019. 37(9): p. 995-1010.                                                                                                        |
|                                            | [19] Fuller, M.A. and I. Koper, Biomedical applications of polyelectrolyte coated spherical gold nanoparticles. Nano Converg, 2019. 6(1): p. 11.                |
|                                            | [33] Masse, F., et al., Gold nanoparticles in ophthalmology. Med Res Rev, 2019. 39(1): p. 302-327.                                                              |
|                                            | [34] Mioc, A., et al., Gold Nanoparticles as Targeted Delivery Systems and Theranostic Agents in Cancer Therapy. Curr Med Chem, 2019. 26(35): p. 6493-6513.     |
|                                            | [35] Sharifi, M., et al., Plasmonic gold nanoparticles: Optical manipulation, imaging, drug delivery and therapy. J Control Release, 2019. 311-312: p. 170-189. |
|                                            | [36] Singh, R., Nanotechnology based therapeutic application in cancer diagnosis and therapy. 3 Biotech, 2019. 9(11): p. 415.                                   |
| <b>Localized surface plasmon resonance</b> | [11] Nie, L., et al., Applications of gold nanoparticles in optical biosensors. J Biomed Nanotechnol, 2014. 10(10): p. 2700-21.                                 |
|                                            | [37] Samanta, A., S. Banerjee, and Y. Liu, DNA nanotechnology for nanophotonic applications. Nanoscale, 2015. 7(6): p. 2210-20.                                 |
|                                            | [38] Ahmad, R., et al., Advanced Gold Nanomaterials for Photothermal Therapy of Cancer. J Nanosci Nanotechnol, 2016. 16(1): p. 67-80.                           |
|                                            | [39] Kim, H., et al., Near-infrared light-responsive nanomaterials for cancer theranostics. Wiley Interdiscip Rev Nanomed Nanobiotechnol, 2016. 8(1): p. 23-45. |
|                                            | [20] Guo, J., et al., Gold nanoparticles enlighten the future of cancer theranostics. Int J Nanomedicine, 2017. 12: p. 6131-6152.                               |
|                                            | [14] Elahi, N., M. Kamali, and M.H. Baghersad, Recent biomedical applications of gold nanoparticles: A review. Talanta, 2018. 184: p. 537-556.                  |
|                                            | [40] Hussein, E.A., et al., Recent advances in functional nanostructures as cancer photothermal therapy. Int J Nanomedicine, 2018. 13: p. 2897-2906.            |
|                                            | [15] Liu, Y., B.M. Crawford, and T. Vo-Dinh, Gold nanoparticles-mediated photothermal therapy and immunotherapy.                                                |

Immunotherapy, 2018. 10(13): p. 1175-1188.

[16] Singh, P., et al., Gold Nanoparticles in Diagnostics and Therapeutics for Human Cancer. *Int J Mol Sci*, 2018. 19(7).

[31] Xu, J., et al., Research progress of novel inorganic nanometre materials carriers in nanomedicine for cancer diagnosis and treatment. *Artif Cells Nanomed Biotechnol*, 2018. 46(sup3): p. S492-S502.

[41] Yadav, P., et al., Gold laced bio-macromolecules for theranostic application. *Int J Biol Macromol*, 2018. 110: p. 39-53.

[42] Ashikbayeva, Z., et al., Application of Nanoparticles and Nanomaterials in Thermal Ablation Therapy of Cancer. *Nanomaterials (Basel)*, 2019. 9(9).

[28] Chang, C.C., et al., Gold Nanoparticle-Based Colorimetric Strategies for Chemical and Biological Sensing Applications. *Nanomaterials (Basel)*, 2019. 9(6).

[32] Das, P., et al., Multifunctional Magnetic Gold Nanomaterials for Cancer. *Trends Biotechnol*, 2019. 37(9): p. 995-1010.

[19] Fuller, M.A. and I. Koper, Biomedical applications of polyelectrolyte coated spherical gold nanoparticles. *Nano Converg*, 2019. 6(1): p. 11.

[33] Masse, F., et al., Gold nanoparticles in ophthalmology. *Med Res Rev*, 2019. 39(1): p. 302-327.

[34] Mioc, A., et al., Gold Nanoparticles as Targeted Delivery Systems and Theranostic Agents in Cancer Therapy. *Curr Med Chem*, 2019. 26(35): p. 6493-6513.

[35] Sharifi, M., et al., Plasmonic gold nanoparticles: Optical manipulation, imaging, drug delivery and therapy. *J Control Release*, 2019. 311-312: p. 170-189.

[36] Singh, R., Nanotechnology based therapeutic application in cancer diagnosis and therapy. *3 Biotech*, 2019. 9(11): p. 415.

[43] Son, J., et al., Light-responsive nanomedicine for biophotonic imaging and targeted therapy. *Adv Drug Deliv Rev*, 2019. 138: p. 133-147.

[44] Vines, J.B., et al., Gold Nanoparticles for Photothermal

|                       |                                                                                                                                                                                                                                                                                     |
|-----------------------|-------------------------------------------------------------------------------------------------------------------------------------------------------------------------------------------------------------------------------------------------------------------------------------|
|                       | Cancer Therapy. <i>Front Chem</i> , 2019. 7: p. 167.                                                                                                                                                                                                                                |
|                       | [45] Khlebtsov, N.G., et al., Gap-enhanced Raman tags: fabrication, optical properties, and theranostic applications. <i>Theranostics</i> , 2020. 10(5): p. 2067-2094.                                                                                                              |
| <b>Photochemistry</b> | [46] Urban, C., et al., Externally modulated theranostic nanoparticles. <i>Transl Cancer Res</i> , 2013. 2(4): p. 292-308.                                                                                                                                                          |
| <b>Photophysics</b>   | [47] Susie, E. and e.-S.M. A, Why gold nanoparticles are more precious than pretty gold: noble metal surface plasmon resonance and its enhancement of the radiative and nonradiative properties of nanocrystals of different shapes. <i>Chemical Society reviews</i> , 2006. 35(3). |
| <b>Radioactivity</b>  | [6] Coulter, J.A., et al., Radiosensitising nanoparticles as novel cancer therapeutics--pipe dream or realistic prospect? <i>Clin Oncol (R Coll Radiol)</i> , 2013. 25(10): p. 593-603.                                                                                             |
|                       | [30] Kharisov, B.I., O.V. Kharissova, and S.S. Berdonosov, Radioactive nanoparticles and their main applications: recent advances. <i>Recent Pat Nanotechnol</i> , 2014. 8(2): p. 79-96.                                                                                            |
| <b>Self-assembly</b>  | [48] Wu, C.S., F.K. Liu, and F.H. Ko, Potential role of gold nanoparticles for improved analytical methods: an introduction to characterizations and applications. <i>Anal Bioanal Chem</i> , 2011. 399(1): p. 103-18.                                                              |
|                       | [49] He, X.P., et al., Probing disease-related proteins with fluorogenic composite materials. <i>Chem Soc Rev</i> , 2015. 44(13): p. 4239-4248.                                                                                                                                     |
|                       | [37] Samanta, A., S. Banerjee, and Y. Liu, DNA nanotechnology for nanophotonic applications. <i>Nanoscale</i> , 2015. 7(6): p. 2210-20.                                                                                                                                             |
|                       | [50] Song, J., G. Niu, and X. Chen, Amphiphilic-Polymer-Guided Plasmonic Assemblies and Their Biomedical Applications. <i>Bioconjug Chem</i> , 2017. 28(1): p. 105-114.                                                                                                             |
|                       | [31] Xu, J., et al., Research progress of novel inorganic nanometre materials carriers in nanomedicine for cancer diagnosis and treatment. <i>Artif Cells Nanomed Biotechnol</i> , 2018. 46(sup3): p. S492-S502.                                                                    |
| <b>Toxicity</b>       | [51] Gerber, A., et al., Gold nanoparticles: recent aspects for human toxicology. <i>J Occup Med Toxicol</i> , 2013. 8(1): p. 32.                                                                                                                                                   |

|  |                                                                                                                                                                                                   |
|--|---------------------------------------------------------------------------------------------------------------------------------------------------------------------------------------------------|
|  | [52] Li, J., et al., Toxicity of inorganic nanomaterials in biomedical imaging. <i>Biotechnol Adv</i> , 2014. 32(4): p. 727-43.                                                                   |
|  | [53] Hadrup, N., et al., Toxicological risk assessment of elemental gold following oral exposure to sheets and nanoparticles - A review. <i>Regul Toxicol Pharmacol</i> , 2015. 72(2): p. 216-21. |
|  | [54] De Matteis, V., Exposure to Inorganic Nanoparticles: Routes of Entry, Immune Response, Biodistribution and In Vitro/In Vivo Toxicity Evaluation. <i>Toxics</i> , 2017. 5(4).                 |
|  | [55] Y.-P. Jia, B.-Y. Ma, X.-W. Wei, Z.-Y. Qian, The in vitro and in vivo toxicity of gold nanoparticles, <i>Chinese Chemical Letters</i> 28(04) (2017) 691-702.                                  |
|  | [16] Singh, P., et al., Gold Nanoparticles in Diagnostics and Therapeutics for Human Cancer. <i>Int J Mol Sci</i> , 2018. 19(7).                                                                  |

1. Hao, E., G.C. Schatz, and J.T. Hupp, *Synthesis and optical properties of anisotropic metal nanoparticles*. *J Fluoresc*, 2004. 14(4): p. 331-41.
2. Li, N., P. Zhao, and D. Astruc, *Anisotropic gold nanoparticles: synthesis, properties, applications, and toxicity*. *Angew Chem Int Ed Engl*, 2014. 53(7): p. 1756-89.
3. Jones, S., et al., *Recent progress on the development of anisotropic gold nanoparticles: Design strategies and growth mechanism*. *J Environ Sci Health C Environ Carcinog Ecotoxicol Rev*, 2017. 35(1): p. 47-66.
4. Reguera, J., et al., *Anisotropic metal nanoparticles for surface enhanced Raman scattering*. *Chem Soc Rev*, 2017. 46(13): p. 3866-3885.
5. Kohout, C., C. Santi, and L. Polito, *Anisotropic Gold Nanoparticles in Biomedical Applications*. *Int J Mol Sci*, 2018. 19(11).
6. Coulter, J.A., et al., *Radiosensitising nanoparticles as novel cancer therapeutics--pipe dream or realistic prospect?* *Clin Oncol (R Coll Radiol)*, 2013. 25(10): p. 593-603.
7. Popescu, R.C., M.O. Fufa, and A.M. Grumezescu, *Metal-based nanosystems for diagnosis*. *Rom J Morphol Embryol*, 2015. 56(2 Suppl): p. 635-49.
8. Torrisi, L., *Gold nanoparticles enhancing protontherapy efficiency*. *Recent Pat Nanotechnol*, 2015. 9(1): p. 51-60.
9. Titus, D., E.J. Samuel, and S. Mohana Roopan, *Current scenario of biomedical aspect of metal-based nanoparticles on gel dosimetry*. *Appl Microbiol Biotechnol*, 2016. 100(11): p. 4803-16.
10. Azharuddin, M., et al., *A repertoire of biomedical applications of noble metal nanoparticles*.

- Chem Commun (Camb), 2019. **55**(49): p. 6964-6996.
11. Nie, L., et al., *Applications of gold nanoparticles in optical biosensors*. J Biomed Nanotechnol, 2014. **10**(10): p. 2700-21.
  12. Daraee, H., et al., *Application of gold nanoparticles in biomedical and drug delivery*. Artif Cells Nanomed Biotechnol, 2016. **44**(1): p. 410-22.
  13. Kafshdooz, L., et al., *The application of gold nanoparticles as a promising therapeutic approach in breast and ovarian cancer*. Artif Cells Nanomed Biotechnol, 2016. **44**(5): p. 1222-7.
  14. Elahi, N., M. Kamali, and M.H. Baghersad, *Recent biomedical applications of gold nanoparticles: A review*. Talanta, 2018. **184**: p. 537-556.
  15. Liu, Y., B.M. Crawford, and T. Vo-Dinh, *Gold nanoparticles-mediated photothermal therapy and immunotherapy*. Immunotherapy, 2018. **10**(13): p. 1175-1188.
  16. Singh, P., et al., *Gold Nanoparticles in Diagnostics and Therapeutics for Human Cancer*. Int J Mol Sci, 2018. **19**(7).
  17. Aminabad, N.S., M. Farshbaf, and A. Akbarzadeh, *Recent Advances of Gold Nanoparticles in Biomedical Applications: State of the Art*. Cell Biochem Biophys, 2019. **77**(2): p. 123-137.
  18. Taghizadeh, S., et al., *Gold nanoparticles application in liver cancer*. Photodiagnosis Photodyn Ther, 2019. **25**: p. 389-400.
  19. Fuller, M.A. and I. Koper, *Biomedical applications of polyelectrolyte coated spherical gold nanoparticles*. Nano Converg, 2019. **6**(1): p. 11.
  20. Guo, J., et al., *Gold nanoparticles enlighten the future of cancer theranostics*. Int J Nanomedicine, 2017. **12**: p. 6131-6152.
  21. Hwang, S., et al., *Gold nanoparticle-mediated photothermal therapy: current status and future perspective*. Nanomedicine (Lond), 2014. **9**(13): p. 2003-22.
  22. Almeida, J.P., E.R. Figueroa, and R.A. Drezek, *Gold nanoparticle mediated cancer immunotherapy*. Nanomedicine, 2014. **10**(3): p. 503-14.
  23. Song, S., et al., *Functional nanoprobe for ultrasensitive detection of biomolecules*. Chem Soc Rev, 2010. **39**(11): p. 4234-43.
  24. Jans, H. and Q. Huo, *Gold nanoparticle-enabled biological and chemical detection and analysis*. Chem Soc Rev, 2012. **41**(7): p. 2849-66.
  25. Wang, J. and X. Qu, *Recent progress in nanosensors for sensitive detection of biomolecules*. Nanoscale, 2013. **5**(9): p. 3589-600.
  26. Lo, V.K., A.O. Chan, and C.M. Che, *Gold and silver catalysis: from organic transformation to bioconjugation*. Org Biomol Chem, 2015. **13**(24): p. 6667-80.



27. Jiang, P., et al., *Applications of Gold Nanoparticles in Non-Optical Biosensors*. Nanomaterials (Basel), 2018. **8**(12).
28. Chang, C.C., et al., *Gold Nanoparticle-Based Colorimetric Strategies for Chemical and Biological Sensing Applications*. Nanomaterials (Basel), 2019. **9**(6).
29. Falahati, M., et al., *Gold nanomaterials as key suppliers in biological and chemical sensing, catalysis, and medicine*. Biochim Biophys Acta Gen Subj, 2020. **1864**(1): p. 129435.
30. Kharisov, B.I., O.V. Kharissova, and S.S. Berdonosov, *Radioactive nanoparticles and their main applications: recent advances*. Recent Pat Nanotechnol, 2014. **8**(2): p. 79-96.
31. Xu, J., et al., *Research progress of novel inorganic nanometre materials carriers in nanomedicine for cancer diagnosis and treatment*. Artif Cells Nanomed Biotechnol, 2018. **46**(sup3): p. S492-S502.
32. Das, P., et al., *Multifunctional Magnetic Gold Nanomaterials for Cancer*. Trends Biotechnol, 2019. **37**(9): p. 995-1010.
33. Masse, F., et al., *Gold nanoparticles in ophthalmology*. Med Res Rev, 2019. **39**(1): p. 302-327.
34. Mioc, A., et al., *Gold Nanoparticles as Targeted Delivery Systems and Theranostic Agents in Cancer Therapy*. Curr Med Chem, 2019. **26**(35): p. 6493-6513.
35. Sharifi, M., et al., *Plasmonic gold nanoparticles: Optical manipulation, imaging, drug delivery and therapy*. J Control Release, 2019. **311-312**: p. 170-189.
36. Singh, R., *Nanotechnology based therapeutic application in cancer diagnosis and therapy*. 3 Biotech, 2019. **9**(11): p. 415.
37. Samanta, A., S. Banerjee, and Y. Liu, *DNA nanotechnology for nanophotonic applications*. Nanoscale, 2015. **7**(6): p. 2210-20.
38. Ahmad, R., et al., *Advanced Gold Nanomaterials for Photothermal Therapy of Cancer*. J Nanosci Nanotechnol, 2016. **16**(1): p. 67-80.
39. Kim, H., et al., *Near-infrared light-responsive nanomaterials for cancer theranostics*. Wiley Interdiscip Rev Nanomed Nanobiotechnol, 2016. **8**(1): p. 23-45.
40. Hussein, E.A., et al., *Recent advances in functional nanostructures as cancer photothermal therapy*. Int J Nanomedicine, 2018. **13**: p. 2897-2906.
41. Yadav, P., et al., *Gold laced bio-macromolecules for theranostic application*. Int J Biol Macromol, 2018. **110**: p. 39-53.
42. Ashikbayeva, Z., et al., *Application of Nanoparticles and Nanomaterials in Thermal Ablation Therapy of Cancer*. Nanomaterials (Basel), 2019. **9**(9).
43. Son, J., et al., *Light-responsive nanomedicine for biophotonic imaging and targeted therapy*.

- Adv Drug Deliv Rev, 2019. **138**: p. 133-147.
44. Vines, J.B., et al., *Gold Nanoparticles for Photothermal Cancer Therapy*. Front Chem, 2019. **7**: p. 167.
  45. Khlebtsov, N.G., et al., *Gap-enhanced Raman tags: fabrication, optical properties, and theranostic applications*. Theranostics, 2020. **10**(5): p. 2067-2094.
  46. Urban, C., et al., *Externally modulated theranostic nanoparticles*. Transl Cancer Res, 2013. **2**(4): p. 292-308.
  47. Susie, E. and e.-S.M. A, *Why gold nanoparticles are more precious than pretty gold: noble metal surface plasmon resonance and its enhancement of the radiative and nonradiative properties of nanocrystals of different shapes*. Chemical Society reviews, 2006. **35**(3).
  48. Wu, C.S., F.K. Liu, and F.H. Ko, *Potential role of gold nanoparticles for improved analytical methods: an introduction to characterizations and applications*. Anal Bioanal Chem, 2011. **399**(1): p. 103-18.
  49. He, X.P., et al., *Probing disease-related proteins with fluorogenic composite materials*. Chem Soc Rev, 2015. **44**(13): p. 4239-4248.
  50. Song, J., G. Niu, and X. Chen, *Amphiphilic-Polymer-Guided Plasmonic Assemblies and Their Biomedical Applications*. Bioconjug Chem, 2017. **28**(1): p. 105-114.
  51. Gerber, A., et al., *Gold nanoparticles: recent aspects for human toxicology*. J Occup Med Toxicol, 2013. **8**(1): p. 32.
  52. Li, J., et al., *Toxicity of inorganic nanomaterials in biomedical imaging*. Biotechnol Adv, 2014. **32**(4): p. 727-43.
  53. Hadrup, N., et al., *Toxicological risk assessment of elemental gold following oral exposure to sheets and nanoparticles - A review*. Regul Toxicol Pharmacol, 2015. **72**(2): p. 216-21.
  54. De Matteis, V., *Exposure to Inorganic Nanoparticles: Routes of Entry, Immune Response, Biodistribution and In Vitro/In Vivo Toxicity Evaluation*. Toxics, 2017. **5**(4).
  55. Jia, Y.-P., et al., *The in vitro and in vivo toxicity of gold nanoparticles*. Chinese Chemical Letters, 2017. **28**(04): p. 691-702.
